# Supplementary material
Source: PubMed Central journal article supplement (PMC4746685)
Supplement: supp_tpc.15.00878_TPC2015-00878-REVR1_Supplemental_Figures_and_Tables.pdf [file supp_tpc.15.00878_TPC2015-00878-REVR1_Supplemental_Figures_and_Tables.pdf]

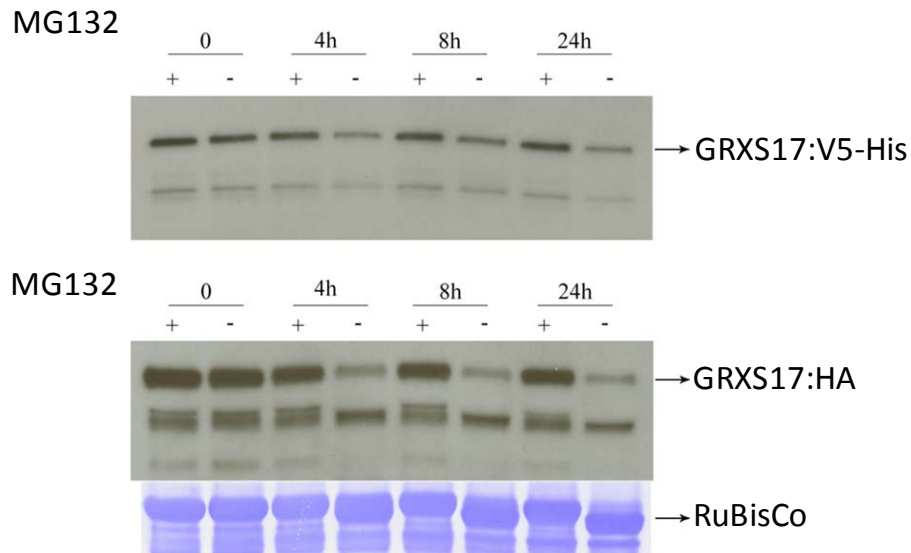

**Supplemental Figure 1.** Degradation of GRXS17 by the 26S proteasome.

**(A)** Cell-free degradation assay. Recombinant protein GRXS17:V5-HIS was incubated with total protein extract prepared from wild-type *Arabidopsis* seedlings in the presence or absence of MG132 for the indicated time.

**(B)** Total proteins extracted from *35S:GRXS17:HA* seedlings and incubated in the presence or absence of MG132. Samples were harvested at the indicated times. Coomassie Blue-stained ribulose-1,5-bisphosphate carboxylase/oxygenase (RuBisCo) was used as loading control. Proteins were detected with anti-V5 (1/2000) or anti-HA (1/1000) antibodies with their respective horseradish peroxidase (HRP)-conjugated secondary antibody.


The ubiquitination site


Plant Systems Biology  
A VIB UGENT DEPARTMENT

Search (comma separated)

### Ubiquitin

| query     | splice variant | uniprot | site                          | sequence window                 | score  | delta score | position | sample |
|-----------|----------------|---------|-------------------------------|---------------------------------|--------|-------------|----------|--------|
| At2G38470 | AT2G38470.1    | Q8S8P5  | _K(ac)YGQK(ac)QVK(Ubi)GSENPR_ | GEDGYNWRKYGQKQVKGSENPRSYYKCTFPN | 31.914 | 29.77       | 198      | test   |

WRKY33, ATWRKY33 WRKY DNA-binding protein 33

[Plaza ©](#)

**Supplemental Figure 2.** The Ubiquitination Site website page.

In a query box, one or multiple AT numbers can be entered, returning the ubiquitination sites on corresponding proteins and information concerning the splice variant, modified sequence, sequence window, and the site position within the protein. The MAXQUANT score and delta score are provided as well. Through its link to PLAZA, access can be gained to ample information concerning the protein(s) in question.

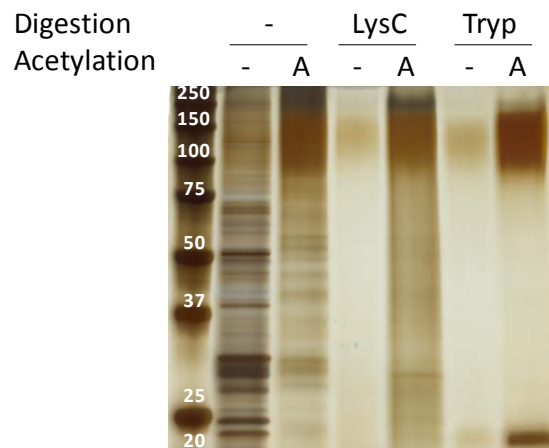

**Supplemental Figure 3. Acetylation efficiency testing.**

Silver-stained SDS-PAGE displaying the resistance of acetylated proteins to cleavage by endoLysC. The used proteolytic enzyme [none (-), endoLysC (LysC), or trypsin (Tryp)] and acetylation status [mock (-) or acetylated (A)] are indicated above the panels.

**Supplemental Table 1. Identified ubiquitination sites on transcription factors and UPS members.**

| Type                         | Entry | AGI code         | Description                                                                                 | Modified peptide sequence                                                                                                                                                                                                                                                          |
|------------------------------|-------|------------------|---------------------------------------------------------------------------------------------|------------------------------------------------------------------------------------------------------------------------------------------------------------------------------------------------------------------------------------------------------------------------------------|
| <b>Transcription factors</b> |       |                  |                                                                                             |                                                                                                                                                                                                                                                                                    |
| bZIP                         |       | <b>AT1G43700</b> | Transcription factor VIP1 (Basic leucine zipper 51) (AtbZIP51)                              | _GTSELNTENK(Ubi)HLKMR_<br>_LAELALLDPK(Ubi)R_<br>_KK(Ubi)VYVSDLESR_                                                                                                                                                                                                                 |
|                              |       | <b>AT3G17609</b> | Transcription factor HY5-like protein HYH (bZip transcription factor AtbZip64)              |                                                                                                                                                                                                                                                                                    |
|                              |       | <b>AT5G11260</b> | Transcription factor HY5 (Protein LONG HYPOCOTYL 5)                                         | _VPEFGGEAVGK(Ubi)ETSGR_<br>_TPAEK(Ubi)ENK(Ubi)R_                                                                                                                                                                                                                                   |
| MYB                          |       | <b>AT1G72650</b> | Myb family transcription factor TRFL6                                                       | _DSVEK(Ubi)SASR_<br>_LSEK(Ubi)SEVR_                                                                                                                                                                                                                                                |
| WRKY                         |       | <b>AT2G04880</b> | WRKY transcription factor 1 (Transcription factor ZAP1)                                     | _E(Ubi)VMEDGYNWR_<br>_KK(Ubi)GGNIELSPVER_<br>_SDVFTAVSKEK(Ubi)TSGSSVQTLR_<br>_KYGQK(Ubi)VVR_<br>_NSSQDHLLAQESK(Ubi)AEGR_<br>_DEEK(Ubi)SLGADMEDLHDETVR_<br>_ETLGK(Ubi)DQVQGVR_<br>_K(Ubi)TSFSPR_<br>_KYGQKQVK(Ubi)GSENPR_<br>_LTFHGVNDNSAQPTTSSEEK(Ubi)PR_<br>_SDTINTQTNEENK(Ubi)K_ |
|                              |       | <b>AT4G26640</b> | WRKY20                                                                                      |                                                                                                                                                                                                                                                                                    |
|                              |       | <b>AT4G22070</b> | WRKY31                                                                                      |                                                                                                                                                                                                                                                                                    |
|                              |       | <b>AT4G30935</b> | WRKY32                                                                                      |                                                                                                                                                                                                                                                                                    |
|                              |       | <b>AT2G38470</b> | WRKY33                                                                                      |                                                                                                                                                                                                                                                                                    |
|                              |       | <b>AT3G01970</b> | WRKY45                                                                                      |                                                                                                                                                                                                                                                                                    |
|                              |       | <b>AT5G49520</b> | WRKY48                                                                                      |                                                                                                                                                                                                                                                                                    |
| bHLH                         |       | <b>AT4G36930</b> | Transcription factor SPATULA (SPT) (Basic helix-loop-helix protein 24)                      | _AAEVHNLSEK(Ubi)R_                                                                                                                                                                                                                                                                 |
|                              |       | <b>AT4G02590</b> | Transcription factor UNE12 (Basic helix-loop-helix protein 59, bHLH 59)                     | _ALQELVPTVNK(Ubi)TDR_                                                                                                                                                                                                                                                              |
| TCP                          |       | <b>AT1G58100</b> | TCP8                                                                                        | _STPPEDSTLATTSSSTATATTTK(Ubi)R_<br>_SVDLSK(Ubi)ENDDR_<br>_EDYFK(ac)EPSSAAEPSESSQK(Ubi)ASQFQEQLAQGR_                                                                                                                                                                                |
|                              |       | <b>AT1G72010</b> | TCP22                                                                                       |                                                                                                                                                                                                                                                                                    |
| <i>Linked to hormones</i>    |       |                  |                                                                                             |                                                                                                                                                                                                                                                                                    |
| ABA                          |       | <b>AT1G45249</b> | Abscisic acid responsive elements-binding factor 2 ABF2                                     | _KSGTVEK(Ubi)VVER_                                                                                                                                                                                                                                                                 |
|                              |       | <b>AT3G56850</b> | ABSCISIC ACID-INSENSITIVE 5-like protein 2 DPBF3 (ABA-responsive element-binding protein 3) | _VASGEVVEK(Ubi)TVER_                                                                                                                                                                                                                                                               |
| Auxin                        |       | <b>AT1G19220</b> | Auxin response factor 19 ARF19 (Auxin-responsive protein IAA22)                             | _TYTKVQK(Ubi)R_                                                                                                                                                                                                                                                                    |
|                              |       | <b>AT5G62000</b> | Auxin response factor 2 ARF2 (ARF1-binding protein, ARF1-BP)                                | _ASSEVSMK(Ubi)GNR_                                                                                                                                                                                                                                                                 |
| Ethylene                     |       | <b>AT5G13330</b> | Ethylene-responsive transcription factor ERF113                                             | _DPKK(Ubi)AAR_<br>_EEEEK(Ubi)NYGYNYNYPR_                                                                                                                                                                                                                                           |
| Brassinosteroids             |       | <b>AT5G07310</b> | Ethylene-responsive transcription factor ERF115                                             | _ANSGNYGK(Ubi)R_                                                                                                                                                                                                                                                                   |

**Ubiquitin conjugation**

|                                 |                  |                                                                          |                               |
|---------------------------------|------------------|--------------------------------------------------------------------------|-------------------------------|
| E1                              | <b>AT5G06460</b> | Ubiquitin-activating enzyme E1 2 UBA2                                    | _LEDVNSK(Ubi)LLR_             |
| E2                              | <b>AT5G50870</b> | Ubiquitin-conjugating enzyme E2 27 UBC27 (Ubiquitin carrier protein 27)  | _VCPK(Ubi)SDNLTR_             |
|                                 | <b>AT1G70660</b> | Ubiquitin-conjugating enzyme E2 variant 1B UEV1B (Ubc enzyme variant 1B) | _GSEEEK(Ubi)VVVPR_            |
|                                 | <b>AT2G36060</b> | Ubiquitin-conjugating enzyme E2 variant 1C UEV1C (Ubc enzyme variant 1C) | _GEK(Ubi)GIGDGTVSYGMDGDDIYMR_ |
|                                 |                  |                                                                          | _K(Ubi)LVQPPEGTFF_            |
| E3                              |                  |                                                                          |                               |
| UBOX                            | <b>AT1G01680</b> | U-box domain-containing protein 54 PUB54                                 | _KETIEK(Ubi)SKSNESDEDPR_      |
|                                 | <b>AT5G05230</b> | U-box domain-containing protein 62 PUB62                                 | _VGEQDPK(Ubi)TR_              |
| ASK                             | <b>AT2G45950</b> | SKP1-like protein 20 ASK20                                               | _IIEGK(Ubi)NPEEIR_            |
|                                 | <b>AT3G61415</b> | SKP1-like protein 21 ASK21                                               | _LK(Ubi)NVEVEEHVDER_          |
|                                 | <b>AT1G20140</b> | SKP1-like protein 4 ASK4                                                 | _IIEGK(Ubi)TPEEIR_            |
| F-box                           | <b>AT2G16365</b> | F-box protein                                                            | _K(Ubi)NESSAETNTLEMDR_        |
|                                 | <b>At1g47765</b> | Putative F-box protein                                                   | _LQSLESSK(Ubi)DTQEDGPR_       |
|                                 | <b>AT4G39756</b> | Putative F-box/kelch-repeat protein                                      | _FELK(Ubi)EIADDQAR_           |
| 26S                             | <b>AT5G43010</b> | 26S protease regulatory subunit 10B homolog A RPT4A                      | _DIK(Ubi)GLATLNR_             |
|                                 | <b>AT3G05530</b> | 26S protease regulatory subunit 6A homolog A RPT5A                       | _K(Ubi)IEIPLPNEQSR_           |
|                                 | <b>AT1G53750</b> | 26S protease regulatory subunit 7 homolog A RPT1A                        | _SKVDKEK(Ubi)LTSGTR_          |
|                                 | <b>AT5G64760</b> | 26S proteasome non-ATPase regulatory subunit 12 homolog B RPN5B          | _K(Ubi)IEFPHPTTEAR_           |
|                                 | <b>AT4G29040</b> | 26S proteasome regulatory subunit 4 homolog A RPT2A                      | _DIEDEIRDEK(Ubi)NPR_          |
|                                 |                  |                                                                          | _LLNEEK(Ubi)QMR_              |
|                                 |                  |                                                                          | _LKPQEEK(Ubi)AEEDR_           |
| <b>Deubiquitinating enzymes</b> |                  |                                                                          |                               |
|                                 | <b>AT3G11910</b> | Ubiquitin carboxyl-terminal hydrolase 13 UBP13                           | _AEEIPEEEK(Ubi)NIGPNDR_       |
|                                 | <b>AT1G51710</b> | Ubiquitin carboxyl-terminal hydrolase 6 UBP6                             | _KK(Ubi)LEAPR_                |
|                                 | <b>AT4G17510</b> | Ubiquitin carboxyl-terminal hydrolase UCH3                               | _ATASESSSSK(Ubi)R_            |

---
